# Supplementary material for: The Effect of a Comprehensive Life-Style Intervention Program of Diet and Exercise on Four Bone-Derived Proteins, FGF-23, Osteopontin, NGAL and Sclerostin, in Overweight or Obese Children and Adolescents
Source: MDPI journal article supplement (doi:10.3390/nu14183772), 2022-09-13
Supplement: s1 [file s1]

Supplemental Table S1. Correlation coefficient of the assessed variables of obese subjects at initial assessment

|                        | FGF-23_t0                  | Change of FGF-23          | Osteopontin_t0            | Change of Osteopontin      | NGAL_t0                   | Change of NGAL             | Sclerostin_t0              | Change of Sclerostin      |
|------------------------|----------------------------|---------------------------|---------------------------|----------------------------|---------------------------|----------------------------|----------------------------|---------------------------|
| BW_t0                  | b= 0.005, p>0.05           | b= 0.058, p>0.05          | b= -0.068, p>0.05         | b= 0.034, p>0.05           | b= 0.135, p>0.05          | b= 0.020, p>0.05           | b=0.121, p>0.05            | b=0.079, p>0.05           |
| BMI_z-score_t0         | b= -0.040, p>0.05          | b=0.147, p>0.05           | b= -0.146, p>0.05         | b=0.090, p>0.05            | b=-0.040, p>0.05          | b= 0.125, p>0.05           | b= 0.098, p>0.05           | b=0.097, p>0.05           |
| TMI_t0                 | b= -0.062, p>0.05          | <b>b=0.174, p&lt;0.05</b> | b=-0.132, p>0.05          | b=0.065, p>0.05            | b= 0.036, p>0.05          | b=0.107, p>0.05            | b= 0.107, p>0.05           | b=0.166, p>0.05           |
| Waist circumference_t0 | b= 0.015, p>0.05           | b=0.040, p>0.05           | b= 0.043, p>0.05          | b=-0.130, p>0.05           | b=0.100, p>0.05           | b=0.595, p>0.05            | b= 0.048, p>0.05           | b=0.210, p>0.05           |
| WHR_t0                 | b= -0.017, p>0.05          | b=0.0004, p>0.05          | b= -0.119, p>0.05         | b=0.079, p>0.05            | b= 0.029, p>0.05          | b=0.059, p>0.05            | b= -0.178, p>0.05          | b=-0.064, p>0.05          |
| WHtR_t0                | b= -0.016, p>0.05          | b=0.081, p>0.05           | b= 0.031, p>0.05          | b=-0.168, p>0.05           | b= 0.021, p>0.05          | b=0.086, p>0.05            | b= -0.042, p>0.05          | <b>b=0.309, p&lt;0.05</b> |
| Glucose_t0             | <b>b=-0.151, p&lt;0.05</b> | b=0.149, p>0.05           | <b>b=0.403, p&lt;0.05</b> | <b>b=-0.260, p&lt;0.05</b> | b=-0.004, p>0.05          | b=-0.013, p>0.05           | b=0.216, p>0.05            | b=0.114, p>0.05           |
| Insulin_t0             | b=-0.001, p>0.05           | b=0.017, p>0.05           | b=0.010, p>0.05           | b=-0.050, p>0.05           | b=-0.020, p>0.05          | b=0.087, p>0.05            | b=0.021, p>0.05            | b=0.227, p>0.05           |
| HbA1c_t0               | b=-0.014, p>0.05           | b=0.011, p>0.05           | b=-0.035, p>0.05          | b=0.022, p>0.05            | <b>b=0.326, p&lt;0.05</b> | <b>b=-0.341, p&lt;0.05</b> | b=-0.057, p<0.05           | b=0.015, p<0.05           |
| HOMA-IR_t0             | b=0.022, p>0.05            | b=-0.027, p<0.05          | b=0.068, p>0.05           | b=-0.075, p<0.05           | b=-0.014, p>0.05          | b=0.084, p<0.05            | b=0.061, p>0.05            | b=0.232, p<0.05           |
| Urea_t0                | b=0.035, p>0.05            | b=0.020, p>0.05           | b=0.069, p>0.05           | b=-0.130, p>0.05           | b=-0.100, p>0.05          | b=0.082, p>0.05            | <b>b=-0.356, p&lt;0.05</b> | b=0.102, p>0.05           |
| Creatinine_t0          | b=-0.054, p>0.05           | b=0.051, p>0.05           | b= 0.0009, p>0.05         | b=-0.026, p>0.05           | b=0.018, p>0.05           | b=0.042, p>0.05            | b=-0.165, p>0.05           | b=-0.015, p>0.05          |
| eGFR_t0                | b=-0.078, p>0.05           | b=-0.061, p>0.05          | b=-0.033, p>0.05          | b=0.023, p>0.05            | b=0.030, p>0.05           | b=-0.069, p>0.05           | b=0.252, p>0.05            | b=-0.016, p>0.05          |
| γGT_t0                 | b=-0.025, p>0.05           | b=0.093, p>0.05           | b=-0.014, p>0.05          | b=-0.059, p>0.05           | b=-0.091, p>0.05          | b=0.079, p>0.05            | b=-0.227, p>0.05           | b=0.084, p>0.05           |
| Total cholesterol_t0   | b=-0.032, p<0.05           | b=0.031, p>0.05           | b=-0.042, p>0.05          | b=0.019, p>0.05            | b=-0.215, p>0.05          | <b>b=-0.271, p&lt;0.05</b> | b=-0.057, p>0.05           | b=-0.185, p>0.05          |
| HDL_t0                 | b=-0.073, p>0.05           | b=0.043, p>0.05           | b=-0.133, p>0.05          | b=0.139, p>0.05            | b=0.009, p>0.05           | b=0.118, p>0.05            | b=-0.101, p>0.05           | b=-0.054, p>0.05          |
| LDL_t0                 | b=                         | b=-0.028,                 | b=-0.046, p>0.05          | b=0.001,                   | b=0.127,                  | b=                         | b=-0.137,                  | b=-0.141,                 |

|                                  |                                |                                 |                            |                                |                      |                                |                               |                      |
|----------------------------------|--------------------------------|---------------------------------|----------------------------|--------------------------------|----------------------|--------------------------------|-------------------------------|----------------------|
|                                  | 0.027,<br>p>0.05               | p>0.05                          |                            | p>0.05                         | p>0.05               | 0.177,<br>p>0.05               | p>0.05                        | p>0.05               |
| <b>Calcium_t0</b>                | b=-0.093,<br>p>0.05            | <b>b=-0.171,<br/>p&lt;0.05</b>  | <b>b=0.275, p&lt;0.05</b>  | b=-0.085,<br>p>0.05            | b=0.057,<br>p>0.05   | b=-0.057,<br>p>0.05            | b=0.151,<br>p>0.05            | b=-0.266,<br>p>0.05  |
| <b>Apo-A1_t0</b>                 | b=-0.032,<br>p>0.05            | b=-0.055,<br>p>0.05             | b=-0.039, p>0.05           | b=0.073,<br>p>0.05             | b= 0.213,<br>p>0.05  | b=-0.166,<br>p>0.05            | b=-0.013,<br>p>0.05           | b=-0.129,<br>p>0.05  |
| <b>Apo-B_t0</b>                  | b=-0.030,<br>p>0.05            | b=-0.049,<br>p>0.05             | b= -0.026,<br>p>0.05       | b=-0.047,<br>p>0.05            | b= 0.049,<br>p>0.05  | b=0.069,<br>p>0.05             | b=-0.095,<br>p>0.05           | b=-0.096,<br>p>0.05  |
| <b>Lp(a)_t0</b>                  | b=-0.093,<br>p>0.05            | b=0.084,<br>p>0.05              | b=-0.130, p>0.05           | b=0.098,<br>p>0.05             | b=-0.054,<br>p>0.05  | b=0.172,<br>p>0.05             | b=-0.161,<br>p>0.05           | b=0.106,<br>p>0.05   |
| <b>PTH_t0</b>                    | b=0.028,<br>p>0.05             | b=0.119,<br>p>0.05              | b=0.011, p>0.05            | b=0.009,<br>p>0.05             | b=0.166,<br>p>0.05   | b=-0.078,<br>p>0.05            | b=0.158,<br>p>0.05            | b=-0.119,<br>p>0.05  |
| <b>VitaminD_t0</b>               | b=0.024,<br>p>0.05             | b=-0.132,<br>p>0.05             | b=0.137, p>0.05            | b=0.033,<br>p>0.05             | b=0.081,<br>p>0.05   | b=-0.104,<br>p>0.05            | b=-0.147,<br>p>0.05           | b=-0.204,<br>p>0.05  |
| <b>Fat percentage_t0</b>         | b=-0.040,<br>p>0.05            | <b>b=0.201,<br/>p&lt;0.05</b>   | b=-0.095, p>0.05           | b=0.069,<br>p>0.05             | b=0.120,<br>p>0.05   | b=0.020,<br>p<0.05             | b=-0.030,<br>p>0.05           | b=-0.153,<br>p>0.05  |
| <b>Fat mass_t0</b>               | b=-0.036,<br>p>0.05            | b=0.148,<br>p>0.05              | b=-0.184, p>0.05           | b=0.113,<br>p>0.05             | b=0.205,<br>p>0.05   | b=0.115,<br>p>0.05             | b=0.068,<br>p>0.05            | b=0.040,<br>p>0.05   |
| <b>Muscle mass percentage_t0</b> | b=-0.002,<br>p>0.05            | b=0.022,<br>p>0.05              | b=-0.128, p>0.05           | b=0.055,<br>p>0.05             | b=0.180,<br>p>0.05   | b=-0.063,<br>p>0.05            | b=0.188,<br>p>0.05            | b=0.064,<br>p>0.05   |
| <b>Bone mass_t0</b>              | b=-0.007,<br>p>0.05            | b=0.028,<br>p>0.05              | b= -0.123,<br>p>0.05       | b=0.046,<br>p>0.05             | b=0.167,<br>p>0.05   | b=0.052,<br>p>0.05             | b=0.196,<br>p>0.05            | b=0.068,<br>p>0.05   |
| <b>Free Fat mass_t0</b>          | b=0.028,<br>p>0.05             | b=0.205,<br>p>0.05              | b=-0.127, p>0.05           | b=0.055,<br>p>0.05             | b=0.179,<br>p>0.05   | b=-0.062,<br>p>0.05            | b=0.188,<br>p>0.05            | b=0.064,<br>p>0.05   |
| <b>FGF23_t0</b>                  | NA                             | <b>b= -0.632,<br/>p&lt;0.05</b> | b= 0.158, p>0.05           | b= -0.04,<br>p>0.05            | b= -0.027,<br>p>0.05 | b= -0.025,<br>p>0.05           | b= 0.318,<br>p>0.05           | b= 0.131,<br>p>0.05  |
| <b>Change of FGF-23</b>          | <b>b=-0.632,<br/>p&lt;0.05</b> | NA                              | <b>b=-0.280, p&lt;0.05</b> | b=0.11,<br>p>0.05              | b=-0.099,<br>p>0.05  | b= 0.126,<br>p>0.05            | <b>b=0.269,<br/>p&lt;0.05</b> | b= 0.042,<br>p>0.05  |
| <b>Osteopontin_t0</b>            | b=0.158,<br>p>0.05             | <b>b=-0.280,<br/>p&lt;0.05</b>  | NA                         | <b>b=-0.780,<br/>p&lt;0.05</b> | b= 0.087,<br>p>0.05  | b=-0.062,<br>p>0.05            | <b>b=0.643,<br/>p&lt;0.05</b> | b= 0.20,<br>p>0.05   |
| <b>Change of Osteopontin</b>     | b=-0.038,<br>p>0.05            | b= 0.114,<br>p>0.05             | <b>b=-0.78, p&lt;0.05</b>  | NA                             | b=-0.08,<br>p>0.05   | b= 0.031,<br>p>0.05            | b= -0.15,<br>p>0.05           | b= -0.245,<br>p>0.05 |
| <b>NGAL_t0</b>                   | b=-0.027,<br>p>0.05            | b= -0.099,<br>p>0.05            | b=0.087, p>0.05            | b=-0.08,<br>p>0.05             | NA                   | <b>b=-0.890,<br/>p&lt;0.05</b> | b= -0.099,<br>p>0.05          | b= 0.147,<br>p>0.05  |

|                             |                           |                            |                           |                  |                            |                  |                   |                   |
|-----------------------------|---------------------------|----------------------------|---------------------------|------------------|----------------------------|------------------|-------------------|-------------------|
| <b>Change of NGAL</b>       | b=-0.025, p>0.05          | b= 0.126, p>0.05           | b=-0.062, p>0.05          | b= 0.031, p>0.05 | <b>b=-0.890, p&lt;0.05</b> | NA               | b= 0.188, p>0.05  | b= 0.093, p>0.05  |
| <b>Sclerostin t_0</b>       | <b>b=0.643, p&lt;0.05</b> | <b>b=-0.269, p&lt;0.05</b> | <b>b=0.643, p&lt;0.05</b> | b= -0.15, p>0.05 | b=-0.099, p>0.05           | b= 0.188, p>0.05 | NA                | b= -0.053, p>0.05 |
| <b>Change of Sclerostin</b> | b=0.131, p>0.05           | b= 0.042, p>0.05           | b=0.20, p>0.05            | b=-0.245, p>0.05 | b=0.147, p>0.05            | b= 0.093, p>0.05 | b= -0.053, p>0.05 | NA                |

Abbreviations: Apo-A1, apolipoprotein A1; Apo-B, apolipoprotein B; BMI, body mass index; BW, body weight; eGFR, estimated glomerular filtration rate; FGF-23, fibroblast growth factor-23; HbA1C, hemoglobin A1C; HDL, high density lipoprotein; HOMA-IR, homeostatic model assessment for insulin resistance;  $\gamma$ GT, gamma-glutamyl transferase; LDL, low density lipoprotein; Lp(a), lipoprotein a; NGAL, neutrophil gelatinase associated lipocalin; PTH, parathormone; TMI, tri-ponderal mass index; WHR, waist-to-hip ratio; WHtR, waist-to-height ratio; Correlations of the studied variables are evaluated by the Pearson's R coefficient, and presented by b. Statistical significance was set at  $p < 0.05$ ; Statistically significant associations are shown in bold; NA, non-applicable

**Supplemental Table S2. Correlation coefficient of the assessed variables of overweight subjects at initial assessment**

|                               | FGF-23_t0         | Change of FGF-23 | Osteopontin_t0             | Change of Osteopontin | NGAL_t0                   | Change of NGAL             | Sclerostin_t0     | Change of Sclerostin       |
|-------------------------------|-------------------|------------------|----------------------------|-----------------------|---------------------------|----------------------------|-------------------|----------------------------|
| <b>BW_t0</b>                  | b= -0.045, p>0.05 | b=0.053, p>0.05  | b= -0.030, p>0.05          | b=0.106, p>0.05       | b= 0.107, p>0.05          | b=-0.085, p>0.05           | b=0.349, p>0.05   | b=-0.033, p>0.05           |
| <b>BMI_z-score_t0</b>         | b= -0.168, p>0.05 | b=0.121, p>0.05  | b= 0.036, p>0.05           | b=-0.050, p>0.05      | b= 0.209, p>0.05          | <b>b=-0.494, p&lt;0.05</b> | b= 0.260, p>0.05  | b= 0.140, p>0.05           |
| <b>TMI_t0</b>                 | b= -0.067, p>0.05 | b= 0.008, p>0.05 | b= 0.072, p>0.05           | b= -0.158, p>0.05     | b= 0.160, p>0.05          | b=- 0.340, p>0.05          | b= -0.301, p>0.05 | b= -0.050, p>0.05          |
| <b>Waist circumference_t0</b> | b=- 0.042, p>0.05 | b= 0.055, p>0.05 | b= 0.183, p>0.05           | b= -0.034, p>0.05     | b= 0.366, p>0.05          | b= -0.289, p>0.05          | b= 0.472, p>0.05  | <b>b=-0.586, p&lt;0.05</b> |
| <b>WHR_t0</b>                 | b= -0.006, p>0.05 | b=0.016, p>0.05  | b= 0.117, p>0.05           | b=-0.148, p>0.05      | b= 0.198, p>0.05          | b=-0.164, p>0.05           | b= 0.301, p>0.05  | <b>b=-0.613, p&lt;0.05</b> |
| <b>WHtR_t0</b>                | b= -0.036, p>0.05 | b=0.049, p>0.05  | b= 0.175, p>0.05           | b=-0.124, p>0.05      | <b>b=0.439, p&lt;0.05</b> | b=-0.317, p>0.05           | b= 0.305, p>0.05  | <b>b=-0.575, p&lt;0.05</b> |
| <b>Glucose_t0</b>             | b=0.037, p>0.05   | b=-0.056, p<0.05 | <b>b= 0.361, p&lt;0.05</b> | b=0.255, p>0.05       | b= 0.054, p>0.05          | b=-0.070, p>0.05           | b=0.176, p>0.05   | b=0.352, p>0.05            |
| <b>Insulin_t0</b>             | b=-0.059, p<0.05  | b=0.025, p>0.05  | b=-0.115, p>0.05           | b=0.120, p>0.05       | b=0.261, p>0.05           | b=0.193, p>0.05            | b=0.295, p<0.05   | <b>b=0.460, p&lt;0.05</b>  |
| <b>HbA1c_t0</b>               | b=-0.223, p>0.05  | b=0.016, p>0.05  | b=-0.022, p>0.05           | b=0.026, p>0.05       | b=0.299, p>0.05           | b=-0.141, p>0.05           | b=0.285, p>0.05   | b=0.121, p>0.05            |
| <b>HOMA-IR_t0</b>             | b=-0.046, p>0.05  | b=0.014, p>0.05  | b=-0.015, p>0.05           | b=0.024, p>0.05       | <b>b=0.401, p&lt;0.05</b> | b=-0.278, p>0.05           | b=0.345, p<0.05   | <b>b=0.557, p&lt;0.05</b>  |
| <b>Urea_t0</b>                | b= -0.021, p>0.05 | b=0.048, p>0.05  | <b>b=-0.277, p&lt;0.05</b> | b=0.200, p>0.05       | b=-0.260, p>0.05          | b=0.218, p>0.05            | b=0.098, p>0.05   | b=-0.166, p>0.05           |
| <b>Creatinine_t0</b>          | b=-0.018, p>0.05  | b=0.014, p>0.05  | b=0.110, p>0.05            | b=-0.119, p>0.05      | b=-0.055, p>0.05          | b=0.043, p>0.05            | b=0.176, p>0.05   | b=-0.004, p>0.05           |
| <b>eGFR_t0</b>                | b=-0.074, p>0.05  | b=0.035, p>0.05  | b=-0.240, p>0.05           | b=0.248, p>0.05       | b=0.030, p>0.05           | b=0.043, p>0.05            | b=-0.059, p>0.05  | b=-0.033, p>0.05           |
| <b>γGT_t0</b>                 | b=-0.334, p>0.05  | b=-0.010, p>0.05 | b=-0.155, p>0.05           | b=0.118, p>0.05       | b=-0.05, p>0.05           | b=-0.015, p>0.05           | b=0.270, p>0.05   | b=-0.224, p>0.05           |
| <b>Uric acid</b>              | b=-0.146, p>0.05  | b=0.108, p>0.05  | b=-0.012, p>0.05           | b=-0.021, p>0.05      | b=0.307, p>0.05           | b=-0.352, p>0.05           | b=-0.070, p>0.05  | <b>b=0.532, p&lt;0.05</b>  |
| <b>Total cholesterol_t0</b>   | b=-0.038, p>0.05  | b=0.072, p>0.05  | b=-0.121, p>0.05           | b=0.050, p>0.05       | b=-0.281, p>0.05          | b=0.256, p>0.05            | b=-0.278, p>0.05  | b=0.175, p>0.05            |
| <b>HDL_t0</b>                 | b=-0.088, p>0.05  | b=0.122, p>0.05  | b=-0.173, p>0.05           | b=0.104, p>0.05       | b=-0.168, p>0.05          | b=0.204, p>0.05            | b=0.006, p>0.05   | b=0.016, p>0.05            |
| <b>LDL_t0</b>                 | b=-0.047, p>0.05  | b=0.080, p>0.05  | b=-0.077, p>0.05           | b=0.032, p>0.05       | b=-0.240, p>0.05          | b=0.197, p>0.05            | b=-0.276, p>0.05  | b=0.095, p>0.05            |
| <b>Apo-A1_t0</b>              | b=-0.070, p>0.05  | b=0.025, p>0.05  | b=-0.051, p>0.05           | b=0.038, p>0.05       | b=-0.124, p>0.05          | b=0.157, p>0.05            | b=-0.215, p>0.05  | b=0.158, p>0.05            |
| <b>Apo-B_t0</b>               | b=-0.010, p>0.05  | b=0.022, p>0.05  | b=-0.028, p>0.05           | b=0.058, p>0.05       | b=-0.224, p>0.05          | b=0.144, p>0.05            | b=-0.359, p>0.05  | b=0.158, p>0.05            |
| <b>Lp(a)_t0</b>               | b=0.0004, p>0.05  | b=0.06, p>0.05   | b=0.142, p>0.05            | b=0.165, p>0.05       | b=0.185, p>0.05           | b=0.023, p>0.05            | b=0.266, p>0.05   | b=0.305, p>0.05            |

|                           |                             |                             |                            |                             |                            |                             |                     |                     |
|---------------------------|-----------------------------|-----------------------------|----------------------------|-----------------------------|----------------------------|-----------------------------|---------------------|---------------------|
| PTH_t0                    | b=-0.078,<br>p>0.05         | b=0.058,<br>p>0.05          | <b>b= 0.260, p&lt;0.05</b> | b=-0.088,<br>p>0.05         | b=0.007,<br>p>0.05         | b=0.023,<br>p>0.05          | b=-0.033,<br>p>0.05 | b=-0.058,<br>p>0.05 |
| VitaminD_t0               | b=0.130,<br>p<0.05          | b=-0.062,<br>p>0.05         | <b>b=0.294, p&lt;0.05</b>  | <b>b=-0.302, p&lt;0.05</b>  | b=-0.139,<br>p>0.05        | b=0.132,<br>p>0.05          | b=-0.309,<br>p>0.05 | b=0.334,<br>p>0.05  |
| Fat percentage_t0         | b=-0.026,<br>p<0.05         | b=0.038,<br>p<0.05          | b= -0.291,<br>p>0.05       | b=0.079,<br>p<0.05          | b=0.008,<br>p>0.05         | b=0.016,<br>p<0.05          | b=-0.254,<br>p<0.05 | b=-0.380,<br>p<0.05 |
| Fat mass_t0               | b=-0.063,<br>p<0.05         | b=0.086,<br>p<0.05          | b=-0.230, p>0.05           | b=0.161,<br>p<0.05          | b=0.033,<br>p>0.05         | b=0.144,<br>p<0.05          | b=0.354,<br>p<0.05  | b=-0.227,<br>p<0.05 |
| Muscle mass percentage_t0 | b=-0.048,<br>p<0.05         | b=0.069,<br>p<0.05          | b=-0.040, p>0.05           | b=0.094,<br>p<0.05          | b= 0.034,<br>p>0.05        | b=-0.151,<br>p<0.05         | b= 0.543,<br>p<0.05 | b=0.021,<br>p<0.05  |
| Bone mass_t0              | b=-0.063,<br>p<0.05         | b=0.081,<br>p<0.05          | b=-0.016, p>0.05           | b=0.092,<br>p<0.05          | b= 0.090,<br>p>0.05        | b=-0.226,<br>p<0.05         | b=0.530,<br>p<0.05  | b=0.018,<br>p<0.05  |
| Free Fat mass_t0          | b=-0.049,<br>p<0.05         | b=0.070,<br>p<0.05          | b= -0.039,<br>p>0.05       | b=0.094,<br>p<0.05          | b= 0.036,<br>p>0.05        | b=-0.155,<br>p<0.05         | b= 0.543,<br>p<0.05 | b=0.021,<br>p<0.05  |
| FGF23_t0                  | NA                          | <b>b= -0.948, p&lt;0.05</b> | b=0.176, p>0.05            | <b>b= -0.263, p&lt;0.05</b> | b=-0.109,<br>p>0.05        | b=0.02,<br>p>0.05           | b= 0.318,<br>p>0.05 | b=-0.298,<br>p>0.05 |
| Change of FGF-23          | <b>b= -0.948, p&lt;0.05</b> | NA                          | b= -0.08, p>0.05           | b=0.079,<br>p>0.05          | b=0.129,<br>p>0.05         | b=0.026,<br>p>0.05          | b=0.105,<br>p>0.05  | b=-0.204,<br>p>0.05 |
| Osteopontin_t0            | b=0.176,<br>p>0.05          | b=0.08,<br>p>0.05           | NA                         | <b>b= -0.840, p&lt;0.05</b> | b= 0.335,<br>p>0.05        | b=-0.229,<br>p>0.05         | b= 0.021,<br>p>0.05 | b=0.230,<br>p>0.05  |
| Change of Osteopontin     | <b>b= -0.263, p&lt;0.05</b> | b=0.079,<br>p>0.05          | <b>b=-0.840, p&lt;0.05</b> | NA                          | <b>b=-0.398, p&lt;0.05</b> | b=0.3,<br>p>0.05            | b=-0.119,<br>p>0.05 | b=-0.232,<br>p>0.05 |
| NGAL_t0                   | b=-0.109,<br>p>0.05         | b=0.129,<br>p>0.05          | b=0.335, p>0.05            | <b>b= -0.398, p&lt;0.05</b> | NA                         | <b>b= -0.776, p&lt;0.05</b> | b= 0.170,<br>p>0.05 | b=0.110,<br>p>0.05  |
| Change of NGAL            | b=0.02,<br>p>0.05           | b=0.261,<br>p>0.05          | b= -0.229,<br>p>0.05       | b=0.3, p>0.05               | <b>b=-0.776, p&lt;0.05</b> | NA                          | b=-0.186,<br>p>0.05 | b=-0.028,<br>p>0.05 |
| Sclerostin_t0             | b=0.318,<br>p>0.05          | b=0.105,<br>p>0.05          | b= 0.021, p>0.05           | b=-0.120,<br>p>0.05         | b= 0.171,<br>p>0.05        | b=-0.186,<br>p>0.05         | NA                  | b=-0.053,<br>p>0.05 |
| Change of Sclerostin      | b=-0.298,<br>p>0.05         | b=0.205,<br>p>0.05          | b=0.23, p>0.05             | b=-0.232,<br>p>0.05         | b= 0.110,<br>p>0.05        | b=-0.028,<br>p>0.05         | b=-0.053,<br>p>0.05 | NA                  |

Abbreviations: Apo-A1, apolipoprotein A1; Apo-B, apolipoprotein B; BMI, body mass index; BW, body weight; eGFR, estimated glomerular filtration rate; FGF-23, fibroblast growth factor-23; HbA1C, hemoglobin A1C; HDL, high density lipoprotein; HOMA-IR, homeostatic model assessment for insulin resistance;  $\gamma$ GT, gamma-glutamyl transferase; LDL, low density lipoprotein; Lp(a), lipoprotein a; NGAL, neutrophil gelatinase associated lipocalin; PTH, parathormone; TMI, tri-ponderal mass index; WHR, waist-to-hip ratio; WHtR, waist-to-height ratio; Correlations of the studied variables are evaluated by the Pearson's R coefficient, and presented by b. Statistical significance was set at  $p < 0.05$ ; Statistically significant associations are shown in bold; NA, non-applicable

---

**Supplemental Table S3. Correlation coefficient of the assessed variables of all subjects at initial assessment  
(overweight and obese)**

|                        | FGF-23_t0           | Change of FGF-23    | Osteopontin_t0                | Change of Osteopontin          | NGAL_t0              | Change of NGAL                 | Sclerostin_t0                  | Change of Sclerostin          |
|------------------------|---------------------|---------------------|-------------------------------|--------------------------------|----------------------|--------------------------------|--------------------------------|-------------------------------|
| BW_t0                  | b=0.066,<br>p>0.05  | b=0.019,<br>p>0.05  | b= 0.053,<br>p>0.05           | b=-0.094,<br>p>0.05            | b=0.163,<br>p>0.05   | b=0.092,<br>p>0.05             | b=0.076,<br>p>0.05             | b=0.145,<br>p>0.05            |
| BMI_z-score_t0         | b=0.056,<br>p>0.05  | b=0.007,<br>p>0.05  | b=-0.353,<br>p>0.05           | b=-0.042,<br>p>0.05            | b=0.091,<br>p>0.05   | b=0.065,<br>p>0.05             | b=0.270,<br>p>0.05             | b=0.197,<br>p>0.05            |
| TMI_t0                 | b= 0.005,<br>p>0.05 | b=0.060,<br>p>0.05  | b=-0.043,<br>p>0.05           | b=-0.067,<br>p>0.05            | b= 0.174,<br>p>0.05  | b=0.28,<br>p>0.05              | b= 0.171,<br>p>0.05            | b=0.199,<br>p>0.05            |
| Waist circumference_t0 | b= 0.107,<br>p>0.05 | b=-0.033,<br>p>0.05 | b= 0.173,<br>p>0.05           | b=-0.112,<br>p>0.05            | b= 0.237,<br>p>0.05  | b=-0.033,<br>p>0.05            | b= 0.014,<br>p>0.05            | b=0.244,<br>p>0.05            |
| WHR_t0                 | b= 0.238,<br>p>0.05 | b=-0.238,<br>p>0.05 | b= -0.047,<br>p>0.05          | b=0.025,<br>p>0.05             | b= 0.103,<br>p>0.05  | b=-0.050,<br>p>0.05            | b= -0.186,<br>p>0.05           | b=-0.087,<br>p>0.05           |
| WHtR_t0                | b= 0.094,<br>p>0.05 | b=-0.041,<br>p>0.05 | b= 0.174,<br>p>0.05           | b=-0.243,<br>p>0.05            | b= 0.247,<br>p>0.05  | b=-0.133,<br>p>0.05            | b= 0.032,<br>p>0.05            | b=0.296,<br>p>0.05            |
| Glucose_t0             | b=0.142,<br>p>0.05  | b=-0.158,<br>p>0.05 | <b>b=0.366,<br/>p&lt;0.05</b> | <b>b=-0.320,<br/>p&lt;0.05</b> | b=- 0.077,<br>p>0.05 | b=0.109,<br>p>0.05             | b= 0.163,<br>p>0.05            | <b>b=0.315,<br/>p&lt;0.05</b> |
| Insulin                | b=-0.008,<br>p>0.05 | b=0.009,<br>p>0.05  | b=0.069,<br>p>0.05            | b=-0.153,<br>p>0.05            | b=0.093,<br>p>0.05   | b=0.009,<br>p>0.05             | b=0.081,<br>p>0.05             | b=0.285,<br>p>0.05            |
| HbA1c                  | b=-0.070,<br>p>0.05 | b=0.107,<br>p>0.05  | b=0.202,<br>p>0.05            | b=-0.172,<br>p>0.05            | b=0.267,<br>p>0.05   | <b>b=-0.304,<br/>p&lt;0.05</b> | b=0.009,<br>p>0.05             | b=0.166,<br>p>0.05            |
| HOMA-IR                | b=0.006,<br>p>0.05  | b=-0.002,<br>p>0.05 | b=0.104,<br>p>0.05            | b=-0.180,<br>p>0.05            | b=0.067,<br>p>0.05   | b=0.035,<br>p>0.05             | b=0.093,<br>p>0.05             | <b>b=0.300,<br/>p&lt;0.05</b> |
| Urea_t0                | b=-0.173,<br>p>0.05 | b=0.172,<br>p>0.05  | b=-0.219,<br>p>0.05           | b=0.137,<br>p>0.05             | b=- 0.226,<br>p>0.05 | b=0.161,<br>p>0.05             | <b>b=-0.324,<br/>p&lt;0.05</b> | b=-0.058,<br>p>0.05           |
| Creatinine_t0          | b=0.017,<br>p>0.05  | b=0.100,<br>p>0.05  | b=0.113,<br>p>0.05            | b=-0.050,<br>p>0.05            | b=- 0.133,<br>p>0.05 | b=0.124,<br>p>0.05             | b=-0.147,<br>p>0.05            | b=0.011,<br>p>0.05            |
| eGFR_t0                | b=0.059,<br>p>0.05  | b=-0.177,<br>p>0.05 | b=-0.120,<br>p>0.05           | b=0.074,<br>p>0.05             | b=0.144,<br>p>0.05   | b=-0.135,<br>p>0.05            | b=0.265,<br>p>0.05             | b=-0.052,<br>p>0.05           |
| γGT_t0                 | b=-0.156,<br>p>0.05 | b=0.161,<br>p>0.05  | b=0.038,<br>p>0.05            | b=-0.065,<br>p>0.05            | b=-0.02,<br>p>0.05   | b=0.082,<br>p>0.05             | <b>b=-0.329,<br/>p&lt;0.05</b> | b=0.074,<br>p>0.05            |
| Total cholesterol_t0   | b=0.025,<br>p>0.05  | b=-0.096,<br>p>0.05 | b=0.063,<br>p>0.05            | b=-0.141,<br>p>0.05            | b=0.142,<br>p>0.05   | b=-0.218,<br>p>0.05            | b=-0.005,<br>p>0.05            | b=-0.126,<br>p>0.05           |
| HDL_t0                 | b=-0.123,<br>p>0.05 | b=0.160,<br>p>0.05  | b=-0.126,<br>p>0.05           | b=0.215,<br>p>0.05             | b=- 0.157,<br>p>0.05 | b=0.229,<br>p>0.05             | b=-0.100,<br>p>0.05            | b=-0.016,<br>p>0.05           |
| LDL_t0                 | b=0.020,<br>p>0.05  | b=0.069,<br>p>0.05  | b=-0.001,<br>p>0.05           | b=-0.158,<br>p>0.05            | b=0.034,<br>p>0.05   | b=-0.050,<br>p>0.05            | b=-0.130,<br>p>0.05            | b=-0.094,<br>p>0.05           |
| ApoA1_t0               | b=-0.007,<br>p>0.05 | b=-0.118,<br>p>0.05 | b=-0.079,<br>p>0.05           | b=0.013,<br>p>0.05             | b=0.073,<br>p>0.05   | b=-0.156,<br>p>0.05            | b=-0.116,<br>p>0.05            | b=0.093,<br>p>0.05            |
| ApoB_t0                | b=0.028,<br>p>0.05  | b=0.035,<br>p>0.05  | b=-0.002,<br>p>0.05           | b=-0.216,<br>p>0.05            | b=0.029,<br>p>0.05   | b=0.095,<br>p>0.05             | b=-0.153,<br>p>0.05            | b=0.027,<br>p>0.05            |

|                           |                                |                                |                                |                                |                                |                                |                                |                                |
|---------------------------|--------------------------------|--------------------------------|--------------------------------|--------------------------------|--------------------------------|--------------------------------|--------------------------------|--------------------------------|
| Lp(a)_t0                  | b=-0.195,<br>p>0.05            | b=0.242,<br>p>0.05             | b=-0.006,<br>p>0.05            | b=-0.081,<br>p>0.05            | b=-0.010,<br>p>0.05            | b=0.089,<br>p>0.05             | b=-0.223,<br>p>0.05            | b=0.098,<br>p>0.05             |
| Fat percentage_t0         | b=-0.264,<br>p>0.05            | <b>b=0.313,<br/>p&lt;0.05</b>  | b=-0.259,<br>p>0.05            | b=0.271,<br>p>0.05             | b=0.038,<br>p>0.05             | b=0.100,<br>p>0.05             | b=-0.004,<br>p>0.05            | b=-0.084,<br>p>0.05            |
| Fat mass_t0               | b=-0.068,<br>p>0.05            | b=0.123,<br>p>0.05             | b=-0.224,<br>p>0.05            | b=0.169,<br>p>0.05             | b=0.166,<br>p>0.05             | b=0.018,<br>p>0.05             | b=-0.115,<br>p>0.05            | b=0.003,<br>p>0.05             |
| Muscle mass percentage_t0 | b=0.200,<br>p>0.05             | b=0.136,<br>p>0.05             | b=-0.049,<br>p>0.05            | b=0.014,<br>p>0.05             | b=0.203,<br>p>0.05             | b=0.084,<br>p>0.05             | b=0.243,<br>p>0.05             | b=0.050,<br>p>0.05             |
| Bone mass_t0              | b=0.196,<br>p>0.05             | b=-0.135,<br>p>0.05            | b=-0.052,<br>p>0.05            | b=-0.010,<br>p>0.05            | b=0.205,<br>p>0.05             | b=-0.092,<br>p>0.05            | b=0.249,<br>p>0.05             | b=-0.052,<br>p>0.05            |
| Free Fat mass_t0          | b=0.199,<br>p>0.05             | b=-0.136,<br>p>0.05            | b=-0.048,<br>p>0.05            | b=-0.014,<br>p>0.05            | b=0.203,<br>p>0.05             | b=0.084,<br>p>0.05             | b=0.243,<br>p>0.05             | b=0.050,<br>p>0.05             |
| FGF23_t0                  | NA                             | <b>b=-0.915,<br/>p&lt;0.05</b> | <b>b=0.574,<br/>p&lt;0.05</b>  | b=-0.077,<br>p>0.05            | b=-0.004,<br>p>0.05            | b=-0.086,<br>p>0.05            | <b>b=0.443,<br/>p&lt;0.05</b>  | b=-0.103,<br>p>0.05            |
| Change of FGF-23          | <b>b=-0.946,<br/>p&lt;0.05</b> | NA                             | b=0.055,<br>p>0.05             | b=0.124,<br>p>0.05             | b=0.050,<br>p>0.05             | b=0.104,<br>p>0.05             | <b>b=-0.344,<br/>p&lt;0.05</b> | b=0.024,<br>p>0.05             |
| Osteopontin_t0            | <b>b=0.574,<br/>p&lt;0.05</b>  | <b>b=-0.534,<br/>p&lt;0.05</b> | NA                             | <b>b=-0.839,<br/>p&lt;0.05</b> | b=-0.192,<br>p>0.05            | b=-0.109,<br>p>0.05            | b=0.250,<br>p>0.05             | <b>b=0.299,<br/>p&lt;0.05</b>  |
| Change of Osteopontin     | <b>b=-0.489,<br/>p&lt;0.05</b> | <b>b=0.442,<br/>p&lt;0.05</b>  | <b>b=-0.839,<br/>p&lt;0.05</b> | NA                             | <b>b=-0.332,<br/>p&lt;0.05</b> | b=0.146,<br>p>0.05             | b=-0.140,<br>p>0.05            | <b>b=-0.352,<br/>p&lt;0.05</b> |
| NGAL_t0                   | b=0.004,<br>p>0.05             | b=-0.088,<br>p>0.05            | b=0.192,<br>p>0.05             | <b>b=-0.332,<br/>p&lt;0.05</b> | NA                             | <b>b=-0.882,<br/>p&lt;0.05</b> | b=-0.112,<br>p>0.05            | b=0.236,<br>p>0.05             |
| Change of NGAL            | b=-0.039,<br>p>0.05            | b=0.146,<br>p>0.05             | b=-0.109,<br>p>0.05            | b=0.146,<br>p>0.05             | <b>b=0.547,<br/>p&lt;0.05</b>  | NA                             | b=0.099,<br>p>0.05             | b=-0.146,<br>p>0.05            |
| Sclerostin t_0            | <b>b=0.443,<br/>p&lt;0.05</b>  | <b>b=-0.344,<br/>p&lt;0.05</b> | b=-0.156,<br>p>0.05            | b=-0.140,<br>p>0.05            | b=-0.112,<br>p>0.05            | b=0.099,<br>p>0.05             | NA                             | b=-0.071,<br>p>0.05            |
| Change of Sclerostin      | <b>b=0.385,<br/>p&lt;0.05</b>  | <b>b=-0.357,<br/>p&lt;0.05</b> | <b>b=0.299,<br/>p&lt;0.05</b>  | <b>b=-0.352,<br/>p&lt;0.05</b> | b=0.236,<br>p>0.05             | b=-0.146,<br>p>0.05            | b=-0.071,<br>p>0.05            | NA                             |

Abbreviations: Apo-A1, apolipoprotein A1; Apo-B, apolipoprotein B; BMI, body mass index; BW, body weight; eGFR, estimated glomerular filtration rate; FGF-23, fibroblast growth factor-23; HbA1C, hemoglobin A1C; HDL, high density lipoprotein; HOMA-IR, homeostatic model assessment for insulin resistance;  $\gamma$ GT, gamma-glutamyl transferase; LDL, low density lipoprotein; Lp(a), lipoprotein a; NGAL, neutrophil gelatinase associated lipocalin; TMI, tri-ponderal mass index; WHR, waist-to-hip ratio; WHtR, waist-to-height ratio; Correlations of the studied variables are evaluated by the Pearson's R coefficient, and presented by b. Statistical significance was set at  $p < 0.05$ ; Statistically significant associations are shown in bold; NA, non-applicable
